# Supplementary material
Source: publisher figshare collection journal article supplement (https://brill.figshare.com/ndownloader/files/21827241)
Supplement: Supplementary file 1 [file 21827241]

## Sheet: Rohdaten attrappen Versuche
year	habitat	Attacker1	Colour	Attacked Yes NO Carabids	Attacker2	Attacked Yes NO Birds	Attacker3	Attacked Yes NO Rodents
2012	forest	Carabid	Black	1	Birds	1	Rodents	1
2012	forest	Carabid	Black	1	Birds	1	Rodents	1
2012	forest	Carabid	Black	1	Birds	1	Rodents	1
2012	forest	Carabid	Black	1	Birds	1	Rodents	1
2012	forest	Carabid	Black	1	Birds	1	Rodents	1
2012	forest	Carabid	Black	1	Birds	1	Rodents	1
2012	forest	Carabid	Black	1	Birds	1	Rodents	1
2012	forest	Carabid	Black	1	Birds	1	Rodents	1
2012	forest	Carabid	Black	1	Birds	1	Rodents	1
2012	forest	Carabid	Black	1	Birds	1	Rodents	1
2012	forest	Carabid	Black	1	Birds	1	Rodents	1
2012	forest	Carabid	Black	1	Birds	1	Rodents	1
2012	forest	Carabid	Black	1	Birds	1	Rodents	1
2012	forest	Carabid	Black	1	Birds	0	Rodents	0
2012	forest	Carabid	Black	1	Birds	0	Rodents	0
2012	forest	Carabid	Black	1	Birds	0	Rodents	0
2012	forest	Carabid	Black	1	Birds	0	Rodents	0
2012	forest	Carabid	Black	1	Birds	0	Rodents	0
2012	forest	Carabid	Black	1	Birds	0	Rodents	0
2012	forest	Carabid	Black	1	Birds	0	Rodents	0
2012	forest	Carabid	Black	1	Birds	0	Rodents	0
2012	forest	Carabid	Black	1	Birds	0	Rodents	0
2012	forest	Carabid	Black	1	Birds	0	Rodents	0
2012	forest	Carabid	Black	1	Birds	0	Rodents	0
2012	forest	Carabid	Black	1	Birds	0	Rodents	0
2012	forest	Carabid	Black	1	Birds	0	Rodents	0
2012	forest	Carabid	Black	1	Birds	0	Rodents	0
2012	forest	Carabid	Black	1	Birds	0	Rodents	0
2012	forest	Carabid	Black	1	Birds	0	Rodents	0
2012	forest	Carabid	Black	1	Birds	0	Rodents	0
2012	forest	Carabid	Black	1	Birds	0	Rodents	0
2012	forest	Carabid	Black	0	Birds	0	Rodents	0
2012	forest	Carabid	Black	0	Birds	0	Rodents	0
2012	forest	Carabid	Black	0	Birds	0	Rodents	0
2012	forest	Carabid	Black	0	Birds	0	Rodents	0
2012	forest	Carabid	Black	0	Birds	0	Rodents	0
2012	forest	Carabid	Black	0	Birds	0	Rodents	0
2012	forest	Carabid	Black	0	Birds	0	Rodents	0
2012	forest	Carabid	Black	0	Birds	0	Rodents	0
2012	forest	Carabid	Black	0	Birds	0	Rodents	0
2012	forest	Carabid	Black	0	Birds	0	Rodents	0
2012	forest	Carabid	Black	0	Birds	0	Rodents	0
2012	forest	Carabid	Black	0	Birds	0	Rodents	0
2012	forest	Carabid	Black	0	Birds	0	Rodents	0
2012	forest	Carabid	Black	0	Birds	0	Rodents	0
2012	forest	Carabid	Black	0	Birds	0	Rodents	0
2013	forest	Carabid	Black	1	Birds	1	Rodents	1
2013	forest	Carabid	Black	1	Birds	1	Rodents	1
2013	forest	Carabid	Black	1	Birds	1	Rodents	1
2013	forest	Carabid	Black	1	Birds	1	Rodents	0
2013	forest	Carabid	Black	1	Birds	1	Rodents	0
2013	forest	Carabid	Black	1	Birds	1	Rodents	0
2013	forest	Carabid	Black	1	Birds	0	Rodents	0
2013	forest	Carabid	Black	1	Birds	0	Rodents	0
2013	forest	Carabid	Black	1	Birds	0	Rodents	0
2013	forest	Carabid	Black	1	Birds	0	Rodents	0
2013	forest	Carabid	Black	1	Birds	0	Rodents	0
2013	forest	Carabid	Black	1	Birds	0	Rodents	0
2013	forest	Carabid	Black	1	Birds	0	Rodents	0
2013	forest	Carabid	Black	1	Birds	0	Rodents	0
2013	forest	Carabid	Black	1	Birds	0	Rodents	0
2013	forest	Carabid	Black	1	Birds	0	Rodents	0
2013	forest	Carabid	Black	1	Birds	0	Rodents	0
2013	forest	Carabid	Black	1	Birds	0	Rodents	0
2013	forest	Carabid	Black	1	Birds	0	Rodents	0
2013	forest	Carabid	Black	1	Birds	0	Rodents	0
2013	forest	Carabid	Black	0	Birds	0	Rodents	0
2013	forest	Carabid	Black	0	Birds	0	Rodents	0
2013	forest	Carabid	Black	0	Birds	0	Rodents	0
2013	forest	Carabid	Black	0	Birds	0	Rodents	0
2013	forest	Carabid	Black	0	Birds	0	Rodents	0
2013	forest	Carabid	Black	0	Birds	0	Rodents	0
2013	forest	Carabid	Black	0	Birds	0	Rodents	0
2013	forest	Carabid	Black	0	Birds	0	Rodents	0
2013	forest	Carabid	Black	0	Birds	0	Rodents	0
2013	forest	Carabid	Black	0	Birds	0	Rodents	0
2012	control	Carabid	Black	1	Birds	1	Rodents	0
2012	control	Carabid	Black	1	Birds	1	Rodents	0
2012	control	Carabid	Black	1	Birds	1	Rodents	0
2012	control	Carabid	Black	1	Birds	1	Rodents	0
2012	control	Carabid	Black	1	Birds	1	Rodents	0
2012	control	Carabid	Black	1	Birds	1	Rodents	0
2012	control	Carabid	Black	1	Birds	1	Rodents	0
2012	control	Carabid	Black	1	Birds	1	Rodents	0
2012	control	Carabid	Black	1	Birds	1	Rodents	0
2012	control	Carabid	Black	1	Birds	1	Rodents	0
2012	control	Carabid	Black	1	Birds	1	Rodents	0
2012	control	Carabid	Black	1	Birds	1	Rodents	0
2012	control	Carabid	Black	1	Birds	1	Rodents	0
2012	control	Carabid	Black	1	Birds	1	Rodents	0
2012	control	Carabid	Black	1	Birds	1	Rodents	0
2012	control	Carabid	Black	1	Birds	1	Rodents	0
2012	control	Carabid	Black	0	Birds	1	Rodents	0
2012	control	Carabid	Black	0	Birds	0	Rodents	0
2012	control	Carabid	Black	0	Birds	0	Rodents	0
2012	control	Carabid	Black	0	Birds	0	Rodents	0
2012	control	Carabid	Black	0	Birds	0	Rodents	0
2012	control	Carabid	Black	0	Birds	0	Rodents	0
2012	control	Carabid	Black	0	Birds	0	Rodents	0
2012	control	Carabid	Black	0	Birds	0	Rodents	0
2012	control	Carabid	Black	0	Birds	0	Rodents	0
2012	control	Carabid	Black	0	Birds	0	Rodents	0
2012	control	Carabid	Black	0	Birds	0	Rodents	0
2012	control	Carabid	Black	0	Birds	0	Rodents	0
2012	control	Carabid	Black	0	Birds	0	Rodents	0
2012	control	Carabid	Black	0	Birds	0	Rodents	0
2013	control	Carabid	Black	1	Birds	0	Rodents	0
2013	control	Carabid	Black	0	Birds	0	Rodents	0
2013	control	Carabid	Black	0	Birds	1	Rodents	1
2013	control	Carabid	Black	0	Birds	1	Rodents	0
2013	control	Carabid	Black	1	Birds	0	Rodents	0
2013	control	Carabid	Black	0	Birds	1	Rodents	0
2013	control	Carabid	Black	0	Birds	0	Rodents	0
2013	control	Carabid	Black	0	Birds	0	Rodents	0
2013	control	Carabid	Black	1	Birds	0	Rodents	0
2013	control	Carabid	Black	1	Birds	1	Rodents	0
2013	control	Carabid	Black	0	Birds	1	Rodents	0
2013	control	Carabid	Black	1	Birds	0	Rodents	0
2013	control	Carabid	Black	0	Birds	0	Rodents	1
2013	control	Carabid	Black	0	Birds	0	Rodents	1
2013	control	Carabid	Black	0	Birds	0	Rodents	0
2012	forest	Carabid	BBY	1	Birds	1	Rodents	1
2012	forest	Carabid	BBY	1	Birds	1	Rodents	1
2012	forest	Carabid	BBY	1	Birds	1	Rodents	1
2012	forest	Carabid	BBY	1	Birds	1	Rodents	1
2012	forest	Carabid	BBY	1	Birds	1	Rodents	1
2012	forest	Carabid	BBY	1	Birds	1	Rodents	1
2012	forest	Carabid	BBY	1	Birds	1	Rodents	1
2012	forest	Carabid	BBY	1	Birds	1	Rodents	1
2012	forest	Carabid	BBY	1	Birds	1	Rodents	1
2012	forest	Carabid	BBY	1	Birds	1	Rodents	0
2012	forest	Carabid	BBY	1	Birds	1	Rodents	0
2012	forest	Carabid	BBY	1	Birds	1	Rodents	0
2012	forest	Carabid	BBY	1	Birds	1	Rodents	0
2012	forest	Carabid	BBY	1	Birds	1	Rodents	0
2012	forest	Carabid	BBY	1	Birds	1	Rodents	0
2012	forest	Carabid	BBY	1	Birds	1	Rodents	0
2012	forest	Carabid	BBY	1	Birds	0	Rodents	0
2012	forest	Carabid	BBY	1	Birds	0	Rodents	0
2012	forest	Carabid	BBY	1	Birds	0	Rodents	0
2012	forest	Carabid	BBY	1	Birds	0	Rodents	0
2012	forest	Carabid	BBY	1	Birds	0	Rodents	0
2012	forest	Carabid	BBY	1	Birds	0	Rodents	0
2012	forest	Carabid	BBY	1	Birds	0	Rodents	0
2012	forest	Carabid	BBY	1	Birds	0	Rodents	0
2012	forest	Carabid	BBY	1	Birds	0	Rodents	0
2012	forest	Carabid	BBY	1	Birds	0	Rodents	0
2012	forest	Carabid	BBY	1	Birds	0	Rodents	0
2012	forest	Carabid	BBY	1	Birds	0	Rodents	0
2012	forest	Carabid	BBY	1	Birds	0	Rodents	0
2012	forest	Carabid	BBY	0	Birds	0	Rodents	0
2012	forest	Carabid	BBY	0	Birds	0	Rodents	0
2012	forest	Carabid	BBY	0	Birds	0	Rodents	0
2012	forest	Carabid	BBY	0	Birds	0	Rodents	0
2012	forest	Carabid	BBY	0	Birds	0	Rodents	0
2012	forest	Carabid	BBY	0	Birds	0	Rodents	0
2012	forest	Carabid	BBY	0	Birds	0	Rodents	0
2012	forest	Carabid	BBY	0	Birds	0	Rodents	0
2012	forest	Carabid	BBY	0	Birds	0	Rodents	0
2012	forest	Carabid	BBY	0	Birds	0	Rodents	0
2012	forest	Carabid	BBY	0	Birds	0	Rodents	0
2012	forest	Carabid	BBY	0	Birds	0	Rodents	0
2012	forest	Carabid	BBY	0	Birds	0	Rodents	0
2012	forest	Carabid	BBY	0	Birds	0	Rodents	0
2012	forest	Carabid	BBY	0	Birds	0	Rodents	0
2012	forest	Carabid	BBY	0	Birds	0	Rodents	0
2012	forest	Carabid	BBY	0	Birds	0	Rodents	0
2013	forest	Carabid	BBY	1	Birds	1	Rodents	1
2013	forest	Carabid	BBY	1	Birds	1	Rodents	1
2013	forest	Carabid	BBY	1	Birds	1	Rodents	1
2013	forest	Carabid	BBY	1	Birds	1	Rodents	0
2013	forest	Carabid	BBY	1	Birds	1	Rodents	0
2013	forest	Carabid	BBY	1	Birds	1	Rodents	0
2013	forest	Carabid	BBY	1	Birds	1	Rodents	0
2013	forest	Carabid	BBY	1	Birds	1	Rodents	0
2013	forest	Carabid	BBY	1	Birds	1	Rodents	0
2013	forest	Carabid	BBY	1	Birds	0	Rodents	0
2013	forest	Carabid	BBY	1	Birds	0	Rodents	0
2013	forest	Carabid	BBY	1	Birds	0	Rodents	0
2013	forest	Carabid	BBY	1	Birds	0	Rodents	0
2013	forest	Carabid	BBY	1	Birds	0	Rodents	0
2013	forest	Carabid	BBY	1	Birds	0	Rodents	0
2013	forest	Carabid	BBY	1	Birds	0	Rodents	0
2013	forest	Carabid	BBY	1	Birds	0	Rodents	0
2013	forest	Carabid	BBY	1	Birds	0	Rodents	0
2013	forest	Carabid	BBY	1	Birds	0	Rodents	0
2013	forest	Carabid	BBY	1	Birds	0	Rodents	0
2013	forest	Carabid	BBY	0	Birds	0	Rodents	0
2013	forest	Carabid	BBY	0	Birds	0	Rodents	0
2013	forest	Carabid	BBY	0	Birds	0	Rodents	0
2013	forest	Carabid	BBY	0	Birds	0	Rodents	0
2013	forest	Carabid	BBY	0	Birds	0	Rodents	0
2013	forest	Carabid	BBY	0	Birds	0	Rodents	0
2013	forest	Carabid	BBY	0	Birds	0	Rodents	0
2013	forest	Carabid	BBY	0	Birds	0	Rodents	0
2013	forest	Carabid	BBY	0	Birds	0	Rodents	0
2013	forest	Carabid	BBY	0	Birds	0	Rodents	0
2012	control	Carabid	BBY	1	Birds	1	Rodents	1
2012	control	Carabid	BBY	1	Birds	1	Rodents	1
2012	control	Carabid	BBY	1	Birds	1	Rodents	1
2012	control	Carabid	BBY	1	Birds	1	Rodents	0
2012	control	Carabid	BBY	1	Birds	1	Rodents	0
2012	control	Carabid	BBY	1	Birds	1	Rodents	0
2012	control	Carabid	BBY	1	Birds	1	Rodents	0
2012	control	Carabid	BBY	1	Birds	1	Rodents	0
2012	control	Carabid	BBY	1	Birds	1	Rodents	0
2012	control	Carabid	BBY	1	Birds	1	Rodents	0
2012	control	Carabid	BBY	1	Birds	1	Rodents	0
2012	control	Carabid	BBY	0	Birds	1	Rodents	0
2012	control	Carabid	BBY	0	Birds	1	Rodents	0
2012	control	Carabid	BBY	0	Birds	1	Rodents	0
2012	control	Carabid	BBY	0	Birds	1	Rodents	0
2012	control	Carabid	BBY	0	Birds	1	Rodents	0
2012	control	Carabid	BBY	0	Birds	1	Rodents	0
2012	control	Carabid	BBY	0	Birds	1	Rodents	0
2012	control	Carabid	BBY	0	Birds	1	Rodents	0
2012	control	Carabid	BBY	0	Birds	0	Rodents	0
2012	control	Carabid	BBY	0	Birds	0	Rodents	0
2012	control	Carabid	BBY	0	Birds	0	Rodents	0
2012	control	Carabid	BBY	0	Birds	0	Rodents	0
2012	control	Carabid	BBY	0	Birds	0	Rodents	0
2012	control	Carabid	BBY	0	Birds	0	Rodents	0
2012	control	Carabid	BBY	0	Birds	0	Rodents	0
2012	control	Carabid	BBY	0	Birds	0	Rodents	0
2012	control	Carabid	BBY	0	Birds	0	Rodents	0
2012	control	Carabid	BBY	0	Birds	0	Rodents	0
2012	control	Carabid	BBY	0	Birds	0	Rodents	0
2013	control	Carabid	BBY	0	Birds	1	Rodents	0
2013	control	Carabid	BBY	0	Birds	1	Rodents	1
2013	control	Carabid	BBY	1	Birds	0	Rodents	1
2013	control	Carabid	BBY	1	Birds	0	Rodents	0
2013	control	Carabid	BBY	0	Birds	1	Rodents	1
2013	control	Carabid	BBY	0	Birds	1	Rodents	0
2013	control	Carabid	BBY	1	Birds	1	Rodents	0
2013	control	Carabid	BBY	0	Birds	1	Rodents	0
2013	control	Carabid	BBY	1	Birds	1	Rodents	0
2013	control	Carabid	BBY	1	Birds	0	Rodents	0
2013	control	Carabid	BBY	1	Birds	0	Rodents	0
2013	control	Carabid	BBY	1	Birds	0	Rodents	0
2013	control	Carabid	BBY	0	Birds	1	Rodents	1
2013	control	Carabid	BBY	0	Birds	0	Rodents	0
2013	control	Carabid	BBY	1	Birds	0	Rodents	0
2012	forest	Carabid	YYB	1	Birds	1	Rodents	1
2012	forest	Carabid	YYB	1	Birds	1	Rodents	1
2012	forest	Carabid	YYB	1	Birds	1	Rodents	1
2012	forest	Carabid	YYB	1	Birds	1	Rodents	1
2012	forest	Carabid	YYB	1	Birds	1	Rodents	1
2012	forest	Carabid	YYB	1	Birds	0	Rodents	1
2012	forest	Carabid	YYB	1	Birds	0	Rodents	1
2012	forest	Carabid	YYB	1	Birds	0	Rodents	1
2012	forest	Carabid	YYB	1	Birds	0	Rodents	1
2012	forest	Carabid	YYB	1	Birds	0	Rodents	1
2012	forest	Carabid	YYB	1	Birds	0	Rodents	1
2012	forest	Carabid	YYB	1	Birds	0	Rodents	0
2012	forest	Carabid	YYB	1	Birds	0	Rodents	0
2012	forest	Carabid	YYB	1	Birds	0	Rodents	0
2012	forest	Carabid	YYB	1	Birds	0	Rodents	0
2012	forest	Carabid	YYB	1	Birds	0	Rodents	0
2012	forest	Carabid	YYB	1	Birds	0	Rodents	0
2012	forest	Carabid	YYB	1	Birds	0	Rodents	0
2012	forest	Carabid	YYB	1	Birds	0	Rodents	0
2012	forest	Carabid	YYB	1	Birds	0	Rodents	0
2012	forest	Carabid	YYB	1	Birds	0	Rodents	0
2012	forest	Carabid	YYB	1	Birds	0	Rodents	0
2012	forest	Carabid	YYB	1	Birds	0	Rodents	0
2012	forest	Carabid	YYB	1	Birds	0	Rodents	0
2012	forest	Carabid	YYB	1	Birds	0	Rodents	0
2012	forest	Carabid	YYB	1	Birds	0	Rodents	0
2012	forest	Carabid	YYB	1	Birds	0	Rodents	0
2012	forest	Carabid	YYB	1	Birds	0	Rodents	0
2012	forest	Carabid	YYB	1	Birds	0	Rodents	0
2012	forest	Carabid	YYB	0	Birds	0	Rodents	0
2012	forest	Carabid	YYB	0	Birds	0	Rodents	0
2012	forest	Carabid	YYB	0	Birds	0	Rodents	0
2012	forest	Carabid	YYB	0	Birds	0	Rodents	0
2012	forest	Carabid	YYB	0	Birds	0	Rodents	0
2012	forest	Carabid	YYB	0	Birds	0	Rodents	0
2012	forest	Carabid	YYB	0	Birds	0	Rodents	0
2012	forest	Carabid	YYB	0	Birds	0	Rodents	0
2012	forest	Carabid	YYB	0	Birds	0	Rodents	0
2012	forest	Carabid	YYB	0	Birds	0	Rodents	0
2012	forest	Carabid	YYB	0	Birds	0	Rodents	0
2012	forest	Carabid	YYB	0	Birds	0	Rodents	0
2012	forest	Carabid	YYB	0	Birds	0	Rodents	0
2012	forest	Carabid	YYB	0	Birds	0	Rodents	0
2012	forest	Carabid	YYB	0	Birds	0	Rodents	0
2012	forest	Carabid	YYB	0	Birds	0	Rodents	0
2012	forest	Carabid	YYB	0	Birds	0	Rodents	0
2013	forest	Carabid	YYB	1	Birds	1	Rodents	1
2013	forest	Carabid	YYB	1	Birds	1	Rodents	1
2013	forest	Carabid	YYB	1	Birds	1	Rodents	1
2013	forest	Carabid	YYB	1	Birds	0	Rodents	1
2013	forest	Carabid	YYB	1	Birds	0	Rodents	0
2013	forest	Carabid	YYB	1	Birds	0	Rodents	0
2013	forest	Carabid	YYB	1	Birds	0	Rodents	0
2013	forest	Carabid	YYB	1	Birds	0	Rodents	0
2013	forest	Carabid	YYB	1	Birds	0	Rodents	0
2013	forest	Carabid	YYB	1	Birds	0	Rodents	0
2013	forest	Carabid	YYB	1	Birds	0	Rodents	0
2013	forest	Carabid	YYB	1	Birds	0	Rodents	0
2013	forest	Carabid	YYB	0	Birds	0	Rodents	0
2013	forest	Carabid	YYB	0	Birds	0	Rodents	0
2013	forest	Carabid	YYB	0	Birds	0	Rodents	0
2013	forest	Carabid	YYB	0	Birds	0	Rodents	0
2013	forest	Carabid	YYB	0	Birds	0	Rodents	0
2013	forest	Carabid	YYB	0	Birds	0	Rodents	0
2013	forest	Carabid	YYB	0	Birds	0	Rodents	0
2013	forest	Carabid	YYB	0	Birds	0	Rodents	0
2013	forest	Carabid	YYB	0	Birds	0	Rodents	0
2013	forest	Carabid	YYB	0	Birds	0	Rodents	0
2013	forest	Carabid	YYB	0	Birds	0	Rodents	0
2013	forest	Carabid	YYB	0	Birds	0	Rodents	0
2013	forest	Carabid	YYB	0	Birds	0	Rodents	0
2013	forest	Carabid	YYB	0	Birds	0	Rodents	0
2013	forest	Carabid	YYB	0	Birds	0	Rodents	0
2013	forest	Carabid	YYB	0	Birds	0	Rodents	0
2013	forest	Carabid	YYB	0	Birds	0	Rodents	0
2013	forest	Carabid	YYB	0	Birds	0	Rodents	0
2012	control	Carabid	YYB	1	Birds	1	Rodents	1
2012	control	Carabid	YYB	1	Birds	1	Rodents	1
2012	control	Carabid	YYB	1	Birds	1	Rodents	1
2012	control	Carabid	YYB	1	Birds	1	Rodents	1
2012	control	Carabid	YYB	1	Birds	1	Rodents	0
2012	control	Carabid	YYB	1	Birds	1	Rodents	0
2012	control	Carabid	YYB	1	Birds	1	Rodents	0
2012	control	Carabid	YYB	1	Birds	1	Rodents	0
2012	control	Carabid	YYB	1	Birds	1	Rodents	0
2012	control	Carabid	YYB	1	Birds	1	Rodents	0
2012	control	Carabid	YYB	1	Birds	1	Rodents	0
2012	control	Carabid	YYB	0	Birds	1	Rodents	0
2012	control	Carabid	YYB	0	Birds	1	Rodents	0
2012	control	Carabid	YYB	0	Birds	1	Rodents	0
2012	control	Carabid	YYB	0	Birds	1	Rodents	0
2012	control	Carabid	YYB	0	Birds	1	Rodents	0
2012	control	Carabid	YYB	0	Birds	1	Rodents	0
2012	control	Carabid	YYB	0	Birds	1	Rodents	0
2012	control	Carabid	YYB	0	Birds	0	Rodents	0
2012	control	Carabid	YYB	0	Birds	0	Rodents	0
2012	control	Carabid	YYB	0	Birds	0	Rodents	0
2012	control	Carabid	YYB	0	Birds	0	Rodents	0
2012	control	Carabid	YYB	0	Birds	0	Rodents	0
2012	control	Carabid	YYB	0	Birds	0	Rodents	0
2012	control	Carabid	YYB	0	Birds	0	Rodents	0
2012	control	Carabid	YYB	0	Birds	0	Rodents	0
2012	control	Carabid	YYB	0	Birds	0	Rodents	0
2012	control	Carabid	YYB	0	Birds	0	Rodents	0
2012	control	Carabid	YYB	0	Birds	0	Rodents	0
2012	control	Carabid	YYB	0	Birds	0	Rodents	0
2013	control	Carabid	YYB	0	Birds	0	Rodents	0
2013	control	Carabid	YYB	0	Birds	0	Rodents	0
2013	control	Carabid	YYB	0	Birds	0	Rodents	0
2013	control	Carabid	YYB	0	Birds	1	Rodents	0
2013	control	Carabid	YYB	1	Birds	1	Rodents	0
2013	control	Carabid	YYB	1	Birds	0	Rodents	0
2013	control	Carabid	YYB	1	Birds	0	Rodents	0
2013	control	Carabid	YYB	1	Birds	0	Rodents	0
2013	control	Carabid	YYB	0	Birds	1	Rodents	0
2013	control	Carabid	YYB	0	Birds	0	Rodents	1
2013	control	Carabid	YYB	1	Birds	0	Rodents	1
2013	control	Carabid	YYB	1	Birds	0	Rodents	1
2013	control	Carabid	YYB	0	Birds	0	Rodents	0
2013	control	Carabid	YYB	0	Birds	1	Rodents	0
2013	control	Carabid	YYB	1	Birds	0	Rodents	1
2012	forest	Carabid	Yellow	1	Birds	1	Rodents	1
2012	forest	Carabid	Yellow	1	Birds	1	Rodents	1
2012	forest	Carabid	Yellow	1	Birds	1	Rodents	1
2012	forest	Carabid	Yellow	1	Birds	1	Rodents	1
2012	forest	Carabid	Yellow	1	Birds	0	Rodents	1
2012	forest	Carabid	Yellow	1	Birds	0	Rodents	1
2012	forest	Carabid	Yellow	1	Birds	0	Rodents	1
2012	forest	Carabid	Yellow	1	Birds	0	Rodents	1
2012	forest	Carabid	Yellow	1	Birds	0	Rodents	0
2012	forest	Carabid	Yellow	1	Birds	0	Rodents	0
2012	forest	Carabid	Yellow	1	Birds	0	Rodents	0
2012	forest	Carabid	Yellow	1	Birds	0	Rodents	0
2012	forest	Carabid	Yellow	1	Birds	0	Rodents	0
2012	forest	Carabid	Yellow	0	Birds	0	Rodents	0
2012	forest	Carabid	Yellow	0	Birds	0	Rodents	0
2012	forest	Carabid	Yellow	0	Birds	0	Rodents	0
2012	forest	Carabid	Yellow	0	Birds	0	Rodents	0
2012	forest	Carabid	Yellow	0	Birds	0	Rodents	0
2012	forest	Carabid	Yellow	0	Birds	0	Rodents	0
2012	forest	Carabid	Yellow	0	Birds	0	Rodents	0
2012	forest	Carabid	Yellow	0	Birds	0	Rodents	0
2012	forest	Carabid	Yellow	0	Birds	0	Rodents	0
2012	forest	Carabid	Yellow	0	Birds	0	Rodents	0
2012	forest	Carabid	Yellow	0	Birds	0	Rodents	0
2012	forest	Carabid	Yellow	0	Birds	0	Rodents	0
2012	forest	Carabid	Yellow	0	Birds	0	Rodents	0
2012	forest	Carabid	Yellow	0	Birds	0	Rodents	0
2012	forest	Carabid	Yellow	0	Birds	0	Rodents	0
2012	forest	Carabid	Yellow	0	Birds	0	Rodents	0
2012	forest	Carabid	Yellow	0	Birds	0	Rodents	0
2012	forest	Carabid	Yellow	0	Birds	0	Rodents	0
2012	forest	Carabid	Yellow	0	Birds	0	Rodents	0
2012	forest	Carabid	Yellow	0	Birds	0	Rodents	0
2012	forest	Carabid	Yellow	0	Birds	0	Rodents	0
2012	forest	Carabid	Yellow	0	Birds	0	Rodents	0
2012	forest	Carabid	Yellow	0	Birds	0	Rodents	0
2012	forest	Carabid	Yellow	0	Birds	0	Rodents	0
2012	forest	Carabid	Yellow	0	Birds	0	Rodents	0
2012	forest	Carabid	Yellow	0	Birds	0	Rodents	0
2012	forest	Carabid	Yellow	0	Birds	0	Rodents	0
2012	forest	Carabid	Yellow	0	Birds	0	Rodents	0
2012	forest	Carabid	Yellow	0	Birds	0	Rodents	0
2012	forest	Carabid	Yellow	0	Birds	0	Rodents	0
2012	forest	Carabid	Yellow	0	Birds	0	Rodents	0
2012	forest	Carabid	Yellow	0	Birds	0	Rodents	0
2012	forest	Carabid	Yellow	0	Birds	0	Rodents	0
2013	forest	Carabid	Yellow	1	Birds	0	Rodents	1
2013	forest	Carabid	Yellow	1	Birds	0	Rodents	0
2013	forest	Carabid	Yellow	1	Birds	0	Rodents	0
2013	forest	Carabid	Yellow	1	Birds	0	Rodents	0
2013	forest	Carabid	Yellow	1	Birds	0	Rodents	0
2013	forest	Carabid	Yellow	1	Birds	0	Rodents	0
2013	forest	Carabid	Yellow	1	Birds	0	Rodents	0
2013	forest	Carabid	Yellow	0	Birds	0	Rodents	0
2013	forest	Carabid	Yellow	0	Birds	0	Rodents	0
2013	forest	Carabid	Yellow	0	Birds	0	Rodents	0
2013	forest	Carabid	Yellow	0	Birds	0	Rodents	0
2013	forest	Carabid	Yellow	0	Birds	0	Rodents	0
2013	forest	Carabid	Yellow	0	Birds	0	Rodents	0
2013	forest	Carabid	Yellow	0	Birds	0	Rodents	0
2013	forest	Carabid	Yellow	0	Birds	0	Rodents	0
2013	forest	Carabid	Yellow	0	Birds	0	Rodents	0
2013	forest	Carabid	Yellow	0	Birds	0	Rodents	0
2013	forest	Carabid	Yellow	0	Birds	0	Rodents	0
2013	forest	Carabid	Yellow	0	Birds	0	Rodents	0
2013	forest	Carabid	Yellow	0	Birds	0	Rodents	0
2013	forest	Carabid	Yellow	0	Birds	0	Rodents	0
2013	forest	Carabid	Yellow	0	Birds	0	Rodents	0
2013	forest	Carabid	Yellow	0	Birds	0	Rodents	0
2013	forest	Carabid	Yellow	0	Birds	0	Rodents	0
2013	forest	Carabid	Yellow	0	Birds	0	Rodents	0
2013	forest	Carabid	Yellow	0	Birds	0	Rodents	0
2013	forest	Carabid	Yellow	0	Birds	0	Rodents	0
2013	forest	Carabid	Yellow	0	Birds	0	Rodents	0
2013	forest	Carabid	Yellow	0	Birds	0	Rodents	0
2013	forest	Carabid	Yellow	0	Birds	0	Rodents	0
2012	control	Carabid	Yellow	1	Birds	1	Rodents	1
2012	control	Carabid	Yellow	1	Birds	1	Rodents	1
2012	control	Carabid	Yellow	1	Birds	1	Rodents	0
2012	control	Carabid	Yellow	1	Birds	1	Rodents	0
2012	control	Carabid	Yellow	0	Birds	1	Rodents	0
2012	control	Carabid	Yellow	0	Birds	1	Rodents	0
2012	control	Carabid	Yellow	0	Birds	1	Rodents	0
2012	control	Carabid	Yellow	0	Birds	1	Rodents	0
2012	control	Carabid	Yellow	0	Birds	1	Rodents	0
2012	control	Carabid	Yellow	0	Birds	1	Rodents	0
2012	control	Carabid	Yellow	0	Birds	1	Rodents	0
2012	control	Carabid	Yellow	0	Birds	1	Rodents	0
2012	control	Carabid	Yellow	0	Birds	1	Rodents	0
2012	control	Carabid	Yellow	0	Birds	1	Rodents	0
2012	control	Carabid	Yellow	0	Birds	1	Rodents	0
2012	control	Carabid	Yellow	0	Birds	1	Rodents	0
2012	control	Carabid	Yellow	0	Birds	1	Rodents	0
2012	control	Carabid	Yellow	0	Birds	1	Rodents	0
2012	control	Carabid	Yellow	0	Birds	1	Rodents	0
2012	control	Carabid	Yellow	0	Birds	1	Rodents	0
2012	control	Carabid	Yellow	0	Birds	0	Rodents	0
2012	control	Carabid	Yellow	0	Birds	0	Rodents	0
2012	control	Carabid	Yellow	0	Birds	0	Rodents	0
2012	control	Carabid	Yellow	0	Birds	0	Rodents	0
2012	control	Carabid	Yellow	0	Birds	0	Rodents	0
2012	control	Carabid	Yellow	0	Birds	0	Rodents	0
2012	control	Carabid	Yellow	0	Birds	0	Rodents	0
2012	control	Carabid	Yellow	0	Birds	0	Rodents	0
2012	control	Carabid	Yellow	0	Birds	0	Rodents	0
2012	control	Carabid	Yellow	0	Birds	0	Rodents	0
2013	control	Carabid	Yellow	0	Birds	0	Rodents	0
2013	control	Carabid	Yellow	0	Birds	0	Rodents	0
2013	control	Carabid	Yellow	0	Birds	1	Rodents	0
2013	control	Carabid	Yellow	0	Birds	0	Rodents	0
2013	control	Carabid	Yellow	0	Birds	0	Rodents	0
2013	control	Carabid	Yellow	0	Birds	0	Rodents	0
2013	control	Carabid	Yellow	0	Birds	0	Rodents	0
2013	control	Carabid	Yellow	1	Birds	1	Rodents	0
2013	control	Carabid	Yellow	0	Birds	1	Rodents	0
2013	control	Carabid	Yellow	0	Birds	0	Rodents	0
2013	control	Carabid	Yellow	0	Birds	0	Rodents	0
2013	control	Carabid	Yellow	0	Birds	1	Rodents	0
2013	control	Carabid	Yellow	0	Birds	0	Rodents	0
2013	control	Carabid	Yellow	0	Birds	0	Rodents	0
2013	control	Carabid	Yellow	0	Birds	0	Rodents	0

## Sheet: habitat vergleich
year	habitat	Attacker1	Attacked Yes NO Carabids	Attacker2	Attacked Yes NO Birds	Attacker3	Attacked Yes NO Rodents
2012	forest	Carabid	1
2012	forest	Carabid	1
2012	forest	Carabid	1
2012	forest	Carabid	1
2012	forest	Carabid	1
2012	forest	Carabid	1
2012	forest	Carabid	1
2012	forest	Carabid	1
2012	forest	Carabid	1
2012	forest	Carabid	1
2012	forest	Carabid	1
2012	forest	Carabid	1
2012	forest	Carabid	1
2012	forest	Carabid	1
2012	forest	Carabid	1
2012	forest	Carabid	1
2012	forest	Carabid	1
2012	forest	Carabid	1
2012	forest	Carabid	1
2012	forest	Carabid	1
2012	forest	Carabid	1
2012	forest	Carabid	1
2012	forest	Carabid	1
2012	forest	Carabid	1
2012	forest	Carabid	1
2012	forest	Carabid	1
2012	forest	Carabid	1
2012	forest	Carabid	1
2012	forest	Carabid	1
2012	forest	Carabid	1
2012	forest	Carabid	1
2012	forest	Carabid	0
2012	forest	Carabid	0
2012	forest	Carabid	0
2012	forest	Carabid	0
2012	forest	Carabid	0
2012	forest	Carabid	0
2012	forest	Carabid	0
2012	forest	Carabid	0
2012	forest	Carabid	0
2012	forest	Carabid	0
2012	forest	Carabid	0
2012	forest	Carabid	0
2012	forest	Carabid	0
2012	forest	Carabid	0
2012	forest	Carabid	0
2013	forest	Carabid	1
2013	forest	Carabid	1
2013	forest	Carabid	1
2013	forest	Carabid	1
2013	forest	Carabid	1
2013	forest	Carabid	1
2013	forest	Carabid	1
2013	forest	Carabid	1
2013	forest	Carabid	1
2013	forest	Carabid	1
2013	forest	Carabid	1
2013	forest	Carabid	1
2013	forest	Carabid	1
2013	forest	Carabid	1
2013	forest	Carabid	1
2013	forest	Carabid	1
2013	forest	Carabid	1
2013	forest	Carabid	1
2013	forest	Carabid	1
2013	forest	Carabid	1
2013	forest	Carabid	0
2013	forest	Carabid	0
2013	forest	Carabid	0
2013	forest	Carabid	0
2013	forest	Carabid	0
2013	forest	Carabid	0
2013	forest	Carabid	0
2013	forest	Carabid	0
2013	forest	Carabid	0
2013	forest	Carabid	0
2012	control	Carabid	1
2012	control	Carabid	1
2012	control	Carabid	1
2012	control	Carabid	1
2012	control	Carabid	1
2012	control	Carabid	1
2012	control	Carabid	1
2012	control	Carabid	1
2012	control	Carabid	1
2012	control	Carabid	1
2012	control	Carabid	1
2012	control	Carabid	1
2012	control	Carabid	1
2012	control	Carabid	1
2012	control	Carabid	1
2012	control	Carabid	1
2012	control	Carabid	0
2012	control	Carabid	0
2012	control	Carabid	0
2012	control	Carabid	0
2012	control	Carabid	0
2012	control	Carabid	0
2012	control	Carabid	0
2012	control	Carabid	0
2012	control	Carabid	0
2012	control	Carabid	0
2012	control	Carabid	0
2012	control	Carabid	0
2012	control	Carabid	0
2012	control	Carabid	0
2013	control	Carabid	1
2013	control	Carabid	0
2013	control	Carabid	0
2013	control	Carabid	0
2013	control	Carabid	1
2013	control	Carabid	0
2013	control	Carabid	0
2013	control	Carabid	0
2013	control	Carabid	1
2013	control	Carabid	1
2013	control	Carabid	0
2013	control	Carabid	1
2013	control	Carabid	0
2013	control	Carabid	0
2013	control	Carabid	0
2012	forest	Carabid	1
2012	forest	Carabid	1
2012	forest	Carabid	1
2012	forest	Carabid	1
2012	forest	Carabid	1
2012	forest	Carabid	1
2012	forest	Carabid	1
2012	forest	Carabid	1
2012	forest	Carabid	1
2012	forest	Carabid	1
2012	forest	Carabid	1
2012	forest	Carabid	1
2012	forest	Carabid	1
2012	forest	Carabid	1
2012	forest	Carabid	1
2012	forest	Carabid	1
2012	forest	Carabid	1
2012	forest	Carabid	1
2012	forest	Carabid	1
2012	forest	Carabid	1
2012	forest	Carabid	1
2012	forest	Carabid	1
2012	forest	Carabid	1
2012	forest	Carabid	1
2012	forest	Carabid	1
2012	forest	Carabid	1
2012	forest	Carabid	1
2012	forest	Carabid	1
2012	forest	Carabid	1
2012	forest	Carabid	0
2012	forest	Carabid	0
2012	forest	Carabid	0
2012	forest	Carabid	0
2012	forest	Carabid	0
2012	forest	Carabid	0
2012	forest	Carabid	0
2012	forest	Carabid	0
2012	forest	Carabid	0
2012	forest	Carabid	0
2012	forest	Carabid	0
2012	forest	Carabid	0
2012	forest	Carabid	0
2012	forest	Carabid	0
2012	forest	Carabid	0
2012	forest	Carabid	0
2012	forest	Carabid	0
2013	forest	Carabid	1
2013	forest	Carabid	1
2013	forest	Carabid	1
2013	forest	Carabid	1
2013	forest	Carabid	1
2013	forest	Carabid	1
2013	forest	Carabid	1
2013	forest	Carabid	1
2013	forest	Carabid	1
2013	forest	Carabid	1
2013	forest	Carabid	1
2013	forest	Carabid	1
2013	forest	Carabid	1
2013	forest	Carabid	1
2013	forest	Carabid	1
2013	forest	Carabid	1
2013	forest	Carabid	1
2013	forest	Carabid	1
2013	forest	Carabid	1
2013	forest	Carabid	1
2013	forest	Carabid	0
2013	forest	Carabid	0
2013	forest	Carabid	0
2013	forest	Carabid	0
2013	forest	Carabid	0
2013	forest	Carabid	0
2013	forest	Carabid	0
2013	forest	Carabid	0
2013	forest	Carabid	0
2013	forest	Carabid	0
2012	control	Carabid	1
2012	control	Carabid	1
2012	control	Carabid	1
2012	control	Carabid	1
2012	control	Carabid	1
2012	control	Carabid	1
2012	control	Carabid	1
2012	control	Carabid	1
2012	control	Carabid	1
2012	control	Carabid	1
2012	control	Carabid	1
2012	control	Carabid	0
2012	control	Carabid	0
2012	control	Carabid	0
2012	control	Carabid	0
2012	control	Carabid	0
2012	control	Carabid	0
2012	control	Carabid	0
2012	control	Carabid	0
2012	control	Carabid	0
2012	control	Carabid	0
2012	control	Carabid	0
2012	control	Carabid	0
2012	control	Carabid	0
2012	control	Carabid	0
2012	control	Carabid	0
2012	control	Carabid	0
2012	control	Carabid	0
2012	control	Carabid	0
2012	control	Carabid	0
2013	control	Carabid	0
2013	control	Carabid	0
2013	control	Carabid	1
2013	control	Carabid	1
2013	control	Carabid	0
2013	control	Carabid	0
2013	control	Carabid	1
2013	control	Carabid	0
2013	control	Carabid	1
2013	control	Carabid	1
2013	control	Carabid	1
2013	control	Carabid	1
2013	control	Carabid	0
2013	control	Carabid	0
2013	control	Carabid	1
2012	forest	Carabid	1
2012	forest	Carabid	1
2012	forest	Carabid	1
2012	forest	Carabid	1
2012	forest	Carabid	1
2012	forest	Carabid	1
2012	forest	Carabid	1
2012	forest	Carabid	1
2012	forest	Carabid	1
2012	forest	Carabid	1
2012	forest	Carabid	1
2012	forest	Carabid	1
2012	forest	Carabid	1
2012	forest	Carabid	1
2012	forest	Carabid	1
2012	forest	Carabid	1
2012	forest	Carabid	1
2012	forest	Carabid	1
2012	forest	Carabid	1
2012	forest	Carabid	1
2012	forest	Carabid	1
2012	forest	Carabid	1
2012	forest	Carabid	1
2012	forest	Carabid	1
2012	forest	Carabid	1
2012	forest	Carabid	1
2012	forest	Carabid	1
2012	forest	Carabid	1
2012	forest	Carabid	1
2012	forest	Carabid	0
2012	forest	Carabid	0
2012	forest	Carabid	0
2012	forest	Carabid	0
2012	forest	Carabid	0
2012	forest	Carabid	0
2012	forest	Carabid	0
2012	forest	Carabid	0
2012	forest	Carabid	0
2012	forest	Carabid	0
2012	forest	Carabid	0
2012	forest	Carabid	0
2012	forest	Carabid	0
2012	forest	Carabid	0
2012	forest	Carabid	0
2012	forest	Carabid	0
2012	forest	Carabid	0
2013	forest	Carabid	1
2013	forest	Carabid	1
2013	forest	Carabid	1
2013	forest	Carabid	1
2013	forest	Carabid	1
2013	forest	Carabid	1
2013	forest	Carabid	1
2013	forest	Carabid	1
2013	forest	Carabid	1
2013	forest	Carabid	1
2013	forest	Carabid	1
2013	forest	Carabid	1
2013	forest	Carabid	0
2013	forest	Carabid	0
2013	forest	Carabid	0
2013	forest	Carabid	0
2013	forest	Carabid	0
2013	forest	Carabid	0
2013	forest	Carabid	0
2013	forest	Carabid	0
2013	forest	Carabid	0
2013	forest	Carabid	0
2013	forest	Carabid	0
2013	forest	Carabid	0
2013	forest	Carabid	0
2013	forest	Carabid	0
2013	forest	Carabid	0
2013	forest	Carabid	0
2013	forest	Carabid	0
2013	forest	Carabid	0
2012	control	Carabid	1
2012	control	Carabid	1
2012	control	Carabid	1
2012	control	Carabid	1
2012	control	Carabid	1
2012	control	Carabid	1
2012	control	Carabid	1
2012	control	Carabid	1
2012	control	Carabid	1
2012	control	Carabid	1
2012	control	Carabid	1
2012	control	Carabid	0
2012	control	Carabid	0
2012	control	Carabid	0
2012	control	Carabid	0
2012	control	Carabid	0
2012	control	Carabid	0
2012	control	Carabid	0
2012	control	Carabid	0
2012	control	Carabid	0
2012	control	Carabid	0
2012	control	Carabid	0
2012	control	Carabid	0
2012	control	Carabid	0
2012	control	Carabid	0
2012	control	Carabid	0
2012	control	Carabid	0
2012	control	Carabid	0
2012	control	Carabid	0
2012	control	Carabid	0
2013	control	Carabid	0
2013	control	Carabid	0
2013	control	Carabid	0
2013	control	Carabid	0
2013	control	Carabid	1
2013	control	Carabid	1
2013	control	Carabid	1
2013	control	Carabid	1
2013	control	Carabid	0
2013	control	Carabid	0
2013	control	Carabid	1
2013	control	Carabid	1
2013	control	Carabid	0
2013	control	Carabid	0
2013	control	Carabid	1
2012	forest	Carabid	1
2012	forest	Carabid	1
2012	forest	Carabid	1
2012	forest	Carabid	1
2012	forest	Carabid	1
2012	forest	Carabid	1
2012	forest	Carabid	1
2012	forest	Carabid	1
2012	forest	Carabid	1
2012	forest	Carabid	1
2012	forest	Carabid	1
2012	forest	Carabid	1
2012	forest	Carabid	1
2012	forest	Carabid	0
2012	forest	Carabid	0
2012	forest	Carabid	0
2012	forest	Carabid	0
2012	forest	Carabid	0
2012	forest	Carabid	0
2012	forest	Carabid	0
2012	forest	Carabid	0
2012	forest	Carabid	0
2012	forest	Carabid	0
2012	forest	Carabid	0
2012	forest	Carabid	0
2012	forest	Carabid	0
2012	forest	Carabid	0
2012	forest	Carabid	0
2012	forest	Carabid	0
2012	forest	Carabid	0
2012	forest	Carabid	0
2012	forest	Carabid	0
2012	forest	Carabid	0
2012	forest	Carabid	0
2012	forest	Carabid	0
2012	forest	Carabid	0
2012	forest	Carabid	0
2012	forest	Carabid	0
2012	forest	Carabid	0
2012	forest	Carabid	0
2012	forest	Carabid	0
2012	forest	Carabid	0
2012	forest	Carabid	0
2012	forest	Carabid	0
2012	forest	Carabid	0
2012	forest	Carabid	0
2013	forest	Carabid	1
2013	forest	Carabid	1
2013	forest	Carabid	1
2013	forest	Carabid	1
2013	forest	Carabid	1
2013	forest	Carabid	1
2013	forest	Carabid	1
2013	forest	Carabid	0
2013	forest	Carabid	0
2013	forest	Carabid	0
2013	forest	Carabid	0
2013	forest	Carabid	0
2013	forest	Carabid	0
2013	forest	Carabid	0
2013	forest	Carabid	0
2013	forest	Carabid	0
2013	forest	Carabid	0
2013	forest	Carabid	0
2013	forest	Carabid	0
2013	forest	Carabid	0
2013	forest	Carabid	0
2013	forest	Carabid	0
2013	forest	Carabid	0
2013	forest	Carabid	0
2013	forest	Carabid	0
2013	forest	Carabid	0
2013	forest	Carabid	0
2013	forest	Carabid	0
2013	forest	Carabid	0
2013	forest	Carabid	0
2012	control	Carabid	1
2012	control	Carabid	1
2012	control	Carabid	1
2012	control	Carabid	1
2012	control	Carabid	0
2012	control	Carabid	0
2012	control	Carabid	0
2012	control	Carabid	0
2012	control	Carabid	0
2012	control	Carabid	0
2012	control	Carabid	0
2012	control	Carabid	0
2012	control	Carabid	0
2012	control	Carabid	0
2012	control	Carabid	0
2012	control	Carabid	0
2012	control	Carabid	0
2012	control	Carabid	0
2012	control	Carabid	0
2012	control	Carabid	0
2012	control	Carabid	0
2012	control	Carabid	0
2012	control	Carabid	0
2012	control	Carabid	0
2012	control	Carabid	0
2012	control	Carabid	0
2012	control	Carabid	0
2012	control	Carabid	0
2012	control	Carabid	0
2012	control	Carabid	0
2013	control	Carabid	0
2013	control	Carabid	0
2013	control	Carabid	0
2013	control	Carabid	0
2013	control	Carabid	0
2013	control	Carabid	0
2013	control	Carabid	0
2013	control	Carabid	1
2013	control	Carabid	0
2013	control	Carabid	0
2013	control	Carabid	0
2013	control	Carabid	0
2013	control	Carabid	0
2013	control	Carabid	0
2013	control	Carabid	0
2012	forest	Birds	1
2012	forest	Birds	1
2012	forest	Birds	1
2012	forest	Birds	1
2012	forest	Birds	1
2012	forest	Birds	1
2012	forest	Birds	1
2012	forest	Birds	1
2012	forest	Birds	1
2012	forest	Birds	1
2012	forest	Birds	1
2012	forest	Birds	1
2012	forest	Birds	1
2012	forest	Birds	0
2012	forest	Birds	0
2012	forest	Birds	0
2012	forest	Birds	0
2012	forest	Birds	0
2012	forest	Birds	0
2012	forest	Birds	0
2012	forest	Birds	0
2012	forest	Birds	0
2012	forest	Birds	0
2012	forest	Birds	0
2012	forest	Birds	0
2012	forest	Birds	0
2012	forest	Birds	0
2012	forest	Birds	0
2012	forest	Birds	0
2012	forest	Birds	0
2012	forest	Birds	0
2012	forest	Birds	0
2012	forest	Birds	0
2012	forest	Birds	0
2012	forest	Birds	0
2012	forest	Birds	0
2012	forest	Birds	0
2012	forest	Birds	0
2012	forest	Birds	0
2012	forest	Birds	0
2012	forest	Birds	0
2012	forest	Birds	0
2012	forest	Birds	0
2012	forest	Birds	0
2012	forest	Birds	0
2012	forest	Birds	0
2013	forest	Birds	1
2013	forest	Birds	1
2013	forest	Birds	1
2013	forest	Birds	1
2013	forest	Birds	1
2013	forest	Birds	1
2013	forest	Birds	0
2013	forest	Birds	0
2013	forest	Birds	0
2013	forest	Birds	0
2013	forest	Birds	0
2013	forest	Birds	0
2013	forest	Birds	0
2013	forest	Birds	0
2013	forest	Birds	0
2013	forest	Birds	0
2013	forest	Birds	0
2013	forest	Birds	0
2013	forest	Birds	0
2013	forest	Birds	0
2013	forest	Birds	0
2013	forest	Birds	0
2013	forest	Birds	0
2013	forest	Birds	0
2013	forest	Birds	0
2013	forest	Birds	0
2013	forest	Birds	0
2013	forest	Birds	0
2013	forest	Birds	0
2013	forest	Birds	0
2012	control	Birds	1
2012	control	Birds	1
2012	control	Birds	1
2012	control	Birds	1
2012	control	Birds	1
2012	control	Birds	1
2012	control	Birds	1
2012	control	Birds	1
2012	control	Birds	1
2012	control	Birds	1
2012	control	Birds	1
2012	control	Birds	1
2012	control	Birds	1
2012	control	Birds	1
2012	control	Birds	1
2012	control	Birds	1
2012	control	Birds	1
2012	control	Birds	0
2012	control	Birds	0
2012	control	Birds	0
2012	control	Birds	0
2012	control	Birds	0
2012	control	Birds	0
2012	control	Birds	0
2012	control	Birds	0
2012	control	Birds	0
2012	control	Birds	0
2012	control	Birds	0
2012	control	Birds	0
2012	control	Birds	0
2013	control	Birds	0
2013	control	Birds	0
2013	control	Birds	1
2013	control	Birds	1
2013	control	Birds	0
2013	control	Birds	1
2013	control	Birds	0
2013	control	Birds	0
2013	control	Birds	0
2013	control	Birds	1
2013	control	Birds	1
2013	control	Birds	0
2013	control	Birds	0
2013	control	Birds	0
2013	control	Birds	0
2012	forest	Birds	1
2012	forest	Birds	1
2012	forest	Birds	1
2012	forest	Birds	1
2012	forest	Birds	1
2012	forest	Birds	1
2012	forest	Birds	1
2012	forest	Birds	1
2012	forest	Birds	1
2012	forest	Birds	1
2012	forest	Birds	1
2012	forest	Birds	1
2012	forest	Birds	1
2012	forest	Birds	1
2012	forest	Birds	1
2012	forest	Birds	1
2012	forest	Birds	0
2012	forest	Birds	0
2012	forest	Birds	0
2012	forest	Birds	0
2012	forest	Birds	0
2012	forest	Birds	0
2012	forest	Birds	0
2012	forest	Birds	0
2012	forest	Birds	0
2012	forest	Birds	0
2012	forest	Birds	0
2012	forest	Birds	0
2012	forest	Birds	0
2012	forest	Birds	0
2012	forest	Birds	0
2012	forest	Birds	0
2012	forest	Birds	0
2012	forest	Birds	0
2012	forest	Birds	0
2012	forest	Birds	0
2012	forest	Birds	0
2012	forest	Birds	0
2012	forest	Birds	0
2012	forest	Birds	0
2012	forest	Birds	0
2012	forest	Birds	0
2012	forest	Birds	0
2012	forest	Birds	0
2012	forest	Birds	0
2012	forest	Birds	0
2013	forest	Birds	1
2013	forest	Birds	1
2013	forest	Birds	1
2013	forest	Birds	1
2013	forest	Birds	1
2013	forest	Birds	1
2013	forest	Birds	1
2013	forest	Birds	1
2013	forest	Birds	1
2013	forest	Birds	0
2013	forest	Birds	0
2013	forest	Birds	0
2013	forest	Birds	0
2013	forest	Birds	0
2013	forest	Birds	0
2013	forest	Birds	0
2013	forest	Birds	0
2013	forest	Birds	0
2013	forest	Birds	0
2013	forest	Birds	0
2013	forest	Birds	0
2013	forest	Birds	0
2013	forest	Birds	0
2013	forest	Birds	0
2013	forest	Birds	0
2013	forest	Birds	0
2013	forest	Birds	0
2013	forest	Birds	0
2013	forest	Birds	0
2013	forest	Birds	0
2012	control	Birds	1
2012	control	Birds	1
2012	control	Birds	1
2012	control	Birds	1
2012	control	Birds	1
2012	control	Birds	1
2012	control	Birds	1
2012	control	Birds	1
2012	control	Birds	1
2012	control	Birds	1
2012	control	Birds	1
2012	control	Birds	1
2012	control	Birds	1
2012	control	Birds	1
2012	control	Birds	1
2012	control	Birds	1
2012	control	Birds	1
2012	control	Birds	1
2012	control	Birds	1
2012	control	Birds	0
2012	control	Birds	0
2012	control	Birds	0
2012	control	Birds	0
2012	control	Birds	0
2012	control	Birds	0
2012	control	Birds	0
2012	control	Birds	0
2012	control	Birds	0
2012	control	Birds	0
2012	control	Birds	0
2013	control	Birds	1
2013	control	Birds	1
2013	control	Birds	0
2013	control	Birds	0
2013	control	Birds	1
2013	control	Birds	1
2013	control	Birds	1
2013	control	Birds	1
2013	control	Birds	1
2013	control	Birds	0
2013	control	Birds	0
2013	control	Birds	0
2013	control	Birds	1
2013	control	Birds	0
2013	control	Birds	0
2012	forest	Birds	1
2012	forest	Birds	1
2012	forest	Birds	1
2012	forest	Birds	1
2012	forest	Birds	1
2012	forest	Birds	0
2012	forest	Birds	0
2012	forest	Birds	0
2012	forest	Birds	0
2012	forest	Birds	0
2012	forest	Birds	0
2012	forest	Birds	0
2012	forest	Birds	0
2012	forest	Birds	0
2012	forest	Birds	0
2012	forest	Birds	0
2012	forest	Birds	0
2012	forest	Birds	0
2012	forest	Birds	0
2012	forest	Birds	0
2012	forest	Birds	0
2012	forest	Birds	0
2012	forest	Birds	0
2012	forest	Birds	0
2012	forest	Birds	0
2012	forest	Birds	0
2012	forest	Birds	0
2012	forest	Birds	0
2012	forest	Birds	0
2012	forest	Birds	0
2012	forest	Birds	0
2012	forest	Birds	0
2012	forest	Birds	0
2012	forest	Birds	0
2012	forest	Birds	0
2012	forest	Birds	0
2012	forest	Birds	0
2012	forest	Birds	0
2012	forest	Birds	0
2012	forest	Birds	0
2012	forest	Birds	0
2012	forest	Birds	0
2012	forest	Birds	0
2012	forest	Birds	0
2012	forest	Birds	0
2012	forest	Birds	0
2013	forest	Birds	1
2013	forest	Birds	1
2013	forest	Birds	1
2013	forest	Birds	0
2013	forest	Birds	0
2013	forest	Birds	0
2013	forest	Birds	0
2013	forest	Birds	0
2013	forest	Birds	0
2013	forest	Birds	0
2013	forest	Birds	0
2013	forest	Birds	0
2013	forest	Birds	0
2013	forest	Birds	0
2013	forest	Birds	0
2013	forest	Birds	0
2013	forest	Birds	0
2013	forest	Birds	0
2013	forest	Birds	0
2013	forest	Birds	0
2013	forest	Birds	0
2013	forest	Birds	0
2013	forest	Birds	0
2013	forest	Birds	0
2013	forest	Birds	0
2013	forest	Birds	0
2013	forest	Birds	0
2013	forest	Birds	0
2013	forest	Birds	0
2013	forest	Birds	0
2012	control	Birds	1
2012	control	Birds	1
2012	control	Birds	1
2012	control	Birds	1
2012	control	Birds	1
2012	control	Birds	1
2012	control	Birds	1
2012	control	Birds	1
2012	control	Birds	1
2012	control	Birds	1
2012	control	Birds	1
2012	control	Birds	1
2012	control	Birds	1
2012	control	Birds	1
2012	control	Birds	1
2012	control	Birds	1
2012	control	Birds	1
2012	control	Birds	1
2012	control	Birds	0
2012	control	Birds	0
2012	control	Birds	0
2012	control	Birds	0
2012	control	Birds	0
2012	control	Birds	0
2012	control	Birds	0
2012	control	Birds	0
2012	control	Birds	0
2012	control	Birds	0
2012	control	Birds	0
2012	control	Birds	0
2013	control	Birds	0
2013	control	Birds	0
2013	control	Birds	0
2013	control	Birds	1
2013	control	Birds	1
2013	control	Birds	0
2013	control	Birds	0
2013	control	Birds	0
2013	control	Birds	1
2013	control	Birds	0
2013	control	Birds	0
2013	control	Birds	0
2013	control	Birds	0
2013	control	Birds	1
2013	control	Birds	0
2012	forest	Birds	1
2012	forest	Birds	1
2012	forest	Birds	1
2012	forest	Birds	1
2012	forest	Birds	0
2012	forest	Birds	0
2012	forest	Birds	0
2012	forest	Birds	0
2012	forest	Birds	0
2012	forest	Birds	0
2012	forest	Birds	0
2012	forest	Birds	0
2012	forest	Birds	0
2012	forest	Birds	0
2012	forest	Birds	0
2012	forest	Birds	0
2012	forest	Birds	0
2012	forest	Birds	0
2012	forest	Birds	0
2012	forest	Birds	0
2012	forest	Birds	0
2012	forest	Birds	0
2012	forest	Birds	0
2012	forest	Birds	0
2012	forest	Birds	0
2012	forest	Birds	0
2012	forest	Birds	0
2012	forest	Birds	0
2012	forest	Birds	0
2012	forest	Birds	0
2012	forest	Birds	0
2012	forest	Birds	0
2012	forest	Birds	0
2012	forest	Birds	0
2012	forest	Birds	0
2012	forest	Birds	0
2012	forest	Birds	0
2012	forest	Birds	0
2012	forest	Birds	0
2012	forest	Birds	0
2012	forest	Birds	0
2012	forest	Birds	0
2012	forest	Birds	0
2012	forest	Birds	0
2012	forest	Birds	0
2012	forest	Birds	0
2013	forest	Birds	0
2013	forest	Birds	0
2013	forest	Birds	0
2013	forest	Birds	0
2013	forest	Birds	0
2013	forest	Birds	0
2013	forest	Birds	0
2013	forest	Birds	0
2013	forest	Birds	0
2013	forest	Birds	0
2013	forest	Birds	0
2013	forest	Birds	0
2013	forest	Birds	0
2013	forest	Birds	0
2013	forest	Birds	0
2013	forest	Birds	0
2013	forest	Birds	0
2013	forest	Birds	0
2013	forest	Birds	0
2013	forest	Birds	0
2013	forest	Birds	0
2013	forest	Birds	0
2013	forest	Birds	0
2013	forest	Birds	0
2013	forest	Birds	0
2013	forest	Birds	0
2013	forest	Birds	0
2013	forest	Birds	0
2013	forest	Birds	0
2013	forest	Birds	0
2012	control	Birds	1
2012	control	Birds	1
2012	control	Birds	1
2012	control	Birds	1
2012	control	Birds	1
2012	control	Birds	1
2012	control	Birds	1
2012	control	Birds	1
2012	control	Birds	1
2012	control	Birds	1
2012	control	Birds	1
2012	control	Birds	1
2012	control	Birds	1
2012	control	Birds	1
2012	control	Birds	1
2012	control	Birds	1
2012	control	Birds	1
2012	control	Birds	1
2012	control	Birds	1
2012	control	Birds	1
2012	control	Birds	0
2012	control	Birds	0
2012	control	Birds	0
2012	control	Birds	0
2012	control	Birds	0
2012	control	Birds	0
2012	control	Birds	0
2012	control	Birds	0
2012	control	Birds	0
2012	control	Birds	0
2013	control	Birds	0
2013	control	Birds	0
2013	control	Birds	1
2013	control	Birds	0
2013	control	Birds	0
2013	control	Birds	0
2013	control	Birds	0
2013	control	Birds	1
2013	control	Birds	1
2013	control	Birds	0
2013	control	Birds	0
2013	control	Birds	1
2013	control	Birds	0
2013	control	Birds	0
2013	control	Birds	0
2012	forest	Rodents	1
2012	forest	Rodents	1
2012	forest	Rodents	1
2012	forest	Rodents	1
2012	forest	Rodents	1
2012	forest	Rodents	1
2012	forest	Rodents	1
2012	forest	Rodents	1
2012	forest	Rodents	1
2012	forest	Rodents	1
2012	forest	Rodents	1
2012	forest	Rodents	1
2012	forest	Rodents	1
2012	forest	Rodents	0
2012	forest	Rodents	0
2012	forest	Rodents	0
2012	forest	Rodents	0
2012	forest	Rodents	0
2012	forest	Rodents	0
2012	forest	Rodents	0
2012	forest	Rodents	0
2012	forest	Rodents	0
2012	forest	Rodents	0
2012	forest	Rodents	0
2012	forest	Rodents	0
2012	forest	Rodents	0
2012	forest	Rodents	0
2012	forest	Rodents	0
2012	forest	Rodents	0
2012	forest	Rodents	0
2012	forest	Rodents	0
2012	forest	Rodents	0
2012	forest	Rodents	0
2012	forest	Rodents	0
2012	forest	Rodents	0
2012	forest	Rodents	0
2012	forest	Rodents	0
2012	forest	Rodents	0
2012	forest	Rodents	0
2012	forest	Rodents	0
2012	forest	Rodents	0
2012	forest	Rodents	0
2012	forest	Rodents	0
2012	forest	Rodents	0
2012	forest	Rodents	0
2012	forest	Rodents	0
2013	forest	Rodents	1
2013	forest	Rodents	1
2013	forest	Rodents	1
2013	forest	Rodents	0
2013	forest	Rodents	0
2013	forest	Rodents	0
2013	forest	Rodents	0
2013	forest	Rodents	0
2013	forest	Rodents	0
2013	forest	Rodents	0
2013	forest	Rodents	0
2013	forest	Rodents	0
2013	forest	Rodents	0
2013	forest	Rodents	0
2013	forest	Rodents	0
2013	forest	Rodents	0
2013	forest	Rodents	0
2013	forest	Rodents	0
2013	forest	Rodents	0
2013	forest	Rodents	0
2013	forest	Rodents	0
2013	forest	Rodents	0
2013	forest	Rodents	0
2013	forest	Rodents	0
2013	forest	Rodents	0
2013	forest	Rodents	0
2013	forest	Rodents	0
2013	forest	Rodents	0
2013	forest	Rodents	0
2013	forest	Rodents	0
2012	control	Rodents	0
2012	control	Rodents	0
2012	control	Rodents	0
2012	control	Rodents	0
2012	control	Rodents	0
2012	control	Rodents	0
2012	control	Rodents	0
2012	control	Rodents	0
2012	control	Rodents	0
2012	control	Rodents	0
2012	control	Rodents	0
2012	control	Rodents	0
2012	control	Rodents	0
2012	control	Rodents	0
2012	control	Rodents	0
2012	control	Rodents	0
2012	control	Rodents	0
2012	control	Rodents	0
2012	control	Rodents	0
2012	control	Rodents	0
2012	control	Rodents	0
2012	control	Rodents	0
2012	control	Rodents	0
2012	control	Rodents	0
2012	control	Rodents	0
2012	control	Rodents	0
2012	control	Rodents	0
2012	control	Rodents	0
2012	control	Rodents	0
2012	control	Rodents	0
2013	control	Rodents	0
2013	control	Rodents	0
2013	control	Rodents	1
2013	control	Rodents	0
2013	control	Rodents	0
2013	control	Rodents	0
2013	control	Rodents	0
2013	control	Rodents	0
2013	control	Rodents	0
2013	control	Rodents	0
2013	control	Rodents	0
2013	control	Rodents	0
2013	control	Rodents	1
2013	control	Rodents	1
2013	control	Rodents	0
2012	forest	Rodents	1
2012	forest	Rodents	1
2012	forest	Rodents	1
2012	forest	Rodents	1
2012	forest	Rodents	1
2012	forest	Rodents	1
2012	forest	Rodents	1
2012	forest	Rodents	1
2012	forest	Rodents	1
2012	forest	Rodents	0
2012	forest	Rodents	0
2012	forest	Rodents	0
2012	forest	Rodents	0
2012	forest	Rodents	0
2012	forest	Rodents	0
2012	forest	Rodents	0
2012	forest	Rodents	0
2012	forest	Rodents	0
2012	forest	Rodents	0
2012	forest	Rodents	0
2012	forest	Rodents	0
2012	forest	Rodents	0
2012	forest	Rodents	0
2012	forest	Rodents	0
2012	forest	Rodents	0
2012	forest	Rodents	0
2012	forest	Rodents	0
2012	forest	Rodents	0
2012	forest	Rodents	0
2012	forest	Rodents	0
2012	forest	Rodents	0
2012	forest	Rodents	0
2012	forest	Rodents	0
2012	forest	Rodents	0
2012	forest	Rodents	0
2012	forest	Rodents	0
2012	forest	Rodents	0
2012	forest	Rodents	0
2012	forest	Rodents	0
2012	forest	Rodents	0
2012	forest	Rodents	0
2012	forest	Rodents	0
2012	forest	Rodents	0
2012	forest	Rodents	0
2012	forest	Rodents	0
2012	forest	Rodents	0
2013	forest	Rodents	1
2013	forest	Rodents	1
2013	forest	Rodents	1
2013	forest	Rodents	0
2013	forest	Rodents	0
2013	forest	Rodents	0
2013	forest	Rodents	0
2013	forest	Rodents	0
2013	forest	Rodents	0
2013	forest	Rodents	0
2013	forest	Rodents	0
2013	forest	Rodents	0
2013	forest	Rodents	0
2013	forest	Rodents	0
2013	forest	Rodents	0
2013	forest	Rodents	0
2013	forest	Rodents	0
2013	forest	Rodents	0
2013	forest	Rodents	0
2013	forest	Rodents	0
2013	forest	Rodents	0
2013	forest	Rodents	0
2013	forest	Rodents	0
2013	forest	Rodents	0
2013	forest	Rodents	0
2013	forest	Rodents	0
2013	forest	Rodents	0
2013	forest	Rodents	0
2013	forest	Rodents	0
2013	forest	Rodents	0
2012	control	Rodents	1
2012	control	Rodents	1
2012	control	Rodents	1
2012	control	Rodents	0
2012	control	Rodents	0
2012	control	Rodents	0
2012	control	Rodents	0
2012	control	Rodents	0
2012	control	Rodents	0
2012	control	Rodents	0
2012	control	Rodents	0
2012	control	Rodents	0
2012	control	Rodents	0
2012	control	Rodents	0
2012	control	Rodents	0
2012	control	Rodents	0
2012	control	Rodents	0
2012	control	Rodents	0
2012	control	Rodents	0
2012	control	Rodents	0
2012	control	Rodents	0
2012	control	Rodents	0
2012	control	Rodents	0
2012	control	Rodents	0
2012	control	Rodents	0
2012	control	Rodents	0
2012	control	Rodents	0
2012	control	Rodents	0
2012	control	Rodents	0
2012	control	Rodents	0
2013	control	Rodents	0
2013	control	Rodents	1
2013	control	Rodents	1
2013	control	Rodents	0
2013	control	Rodents	1
2013	control	Rodents	0
2013	control	Rodents	0
2013	control	Rodents	0
2013	control	Rodents	0
2013	control	Rodents	0
2013	control	Rodents	0
2013	control	Rodents	0
2013	control	Rodents	1
2013	control	Rodents	0
2013	control	Rodents	0
2012	forest	Rodents	1
2012	forest	Rodents	1
2012	forest	Rodents	1
2012	forest	Rodents	1
2012	forest	Rodents	1
2012	forest	Rodents	1
2012	forest	Rodents	1
2012	forest	Rodents	1
2012	forest	Rodents	1
2012	forest	Rodents	1
2012	forest	Rodents	1
2012	forest	Rodents	0
2012	forest	Rodents	0
2012	forest	Rodents	0
2012	forest	Rodents	0
2012	forest	Rodents	0
2012	forest	Rodents	0
2012	forest	Rodents	0
2012	forest	Rodents	0
2012	forest	Rodents	0
2012	forest	Rodents	0
2012	forest	Rodents	0
2012	forest	Rodents	0
2012	forest	Rodents	0
2012	forest	Rodents	0
2012	forest	Rodents	0
2012	forest	Rodents	0
2012	forest	Rodents	0
2012	forest	Rodents	0
2012	forest	Rodents	0
2012	forest	Rodents	0
2012	forest	Rodents	0
2012	forest	Rodents	0
2012	forest	Rodents	0
2012	forest	Rodents	0
2012	forest	Rodents	0
2012	forest	Rodents	0
2012	forest	Rodents	0
2012	forest	Rodents	0
2012	forest	Rodents	0
2012	forest	Rodents	0
2012	forest	Rodents	0
2012	forest	Rodents	0
2012	forest	Rodents	0
2012	forest	Rodents	0
2012	forest	Rodents	0
2013	forest	Rodents	1
2013	forest	Rodents	1
2013	forest	Rodents	1
2013	forest	Rodents	1
2013	forest	Rodents	0
2013	forest	Rodents	0
2013	forest	Rodents	0
2013	forest	Rodents	0
2013	forest	Rodents	0
2013	forest	Rodents	0
2013	forest	Rodents	0
2013	forest	Rodents	0
2013	forest	Rodents	0
2013	forest	Rodents	0
2013	forest	Rodents	0
2013	forest	Rodents	0
2013	forest	Rodents	0
2013	forest	Rodents	0
2013	forest	Rodents	0
2013	forest	Rodents	0
2013	forest	Rodents	0
2013	forest	Rodents	0
2013	forest	Rodents	0
2013	forest	Rodents	0
2013	forest	Rodents	0
2013	forest	Rodents	0
2013	forest	Rodents	0
2013	forest	Rodents	0
2013	forest	Rodents	0
2013	forest	Rodents	0
2012	control	Rodents	1
2012	control	Rodents	1
2012	control	Rodents	1
2012	control	Rodents	1
2012	control	Rodents	0
2012	control	Rodents	0
2012	control	Rodents	0
2012	control	Rodents	0
2012	control	Rodents	0
2012	control	Rodents	0
2012	control	Rodents	0
2012	control	Rodents	0
2012	control	Rodents	0
2012	control	Rodents	0
2012	control	Rodents	0
2012	control	Rodents	0
2012	control	Rodents	0
2012	control	Rodents	0
2012	control	Rodents	0
2012	control	Rodents	0
2012	control	Rodents	0
2012	control	Rodents	0
2012	control	Rodents	0
2012	control	Rodents	0
2012	control	Rodents	0
2012	control	Rodents	0
2012	control	Rodents	0
2012	control	Rodents	0
2012	control	Rodents	0
2012	control	Rodents	0
2013	control	Rodents	0
2013	control	Rodents	0
2013	control	Rodents	0
2013	control	Rodents	0
2013	control	Rodents	0
2013	control	Rodents	0
2013	control	Rodents	0
2013	control	Rodents	0
2013	control	Rodents	0
2013	control	Rodents	1
2013	control	Rodents	1
2013	control	Rodents	1
2013	control	Rodents	0
2013	control	Rodents	0
2013	control	Rodents	1
2012	forest	Rodents	1
2012	forest	Rodents	1
2012	forest	Rodents	1
2012	forest	Rodents	1
2012	forest	Rodents	1
2012	forest	Rodents	1
2012	forest	Rodents	1
2012	forest	Rodents	1
2012	forest	Rodents	0
2012	forest	Rodents	0
2012	forest	Rodents	0
2012	forest	Rodents	0
2012	forest	Rodents	0
2012	forest	Rodents	0
2012	forest	Rodents	0
2012	forest	Rodents	0
2012	forest	Rodents	0
2012	forest	Rodents	0
2012	forest	Rodents	0
2012	forest	Rodents	0
2012	forest	Rodents	0
2012	forest	Rodents	0
2012	forest	Rodents	0
2012	forest	Rodents	0
2012	forest	Rodents	0
2012	forest	Rodents	0
2012	forest	Rodents	0
2012	forest	Rodents	0
2012	forest	Rodents	0
2012	forest	Rodents	0
2012	forest	Rodents	0
2012	forest	Rodents	0
2012	forest	Rodents	0
2012	forest	Rodents	0
2012	forest	Rodents	0
2012	forest	Rodents	0
2012	forest	Rodents	0
2012	forest	Rodents	0
2012	forest	Rodents	0
2012	forest	Rodents	0
2012	forest	Rodents	0
2012	forest	Rodents	0
2012	forest	Rodents	0
2012	forest	Rodents	0
2012	forest	Rodents	0
2012	forest	Rodents	0
2013	forest	Rodents	1
2013	forest	Rodents	0
2013	forest	Rodents	0
2013	forest	Rodents	0
2013	forest	Rodents	0
2013	forest	Rodents	0
2013	forest	Rodents	0
2013	forest	Rodents	0
2013	forest	Rodents	0
2013	forest	Rodents	0
2013	forest	Rodents	0
2013	forest	Rodents	0
2013	forest	Rodents	0
2013	forest	Rodents	0
2013	forest	Rodents	0
2013	forest	Rodents	0
2013	forest	Rodents	0
2013	forest	Rodents	0
2013	forest	Rodents	0
2013	forest	Rodents	0
2013	forest	Rodents	0
2013	forest	Rodents	0
2013	forest	Rodents	0
2013	forest	Rodents	0
2013	forest	Rodents	0
2013	forest	Rodents	0
2013	forest	Rodents	0
2013	forest	Rodents	0
2013	forest	Rodents	0
2013	forest	Rodents	0
2012	control	Rodents	1
2012	control	Rodents	1
2012	control	Rodents	0
2012	control	Rodents	0
2012	control	Rodents	0
2012	control	Rodents	0
2012	control	Rodents	0
2012	control	Rodents	0
2012	control	Rodents	0
2012	control	Rodents	0
2012	control	Rodents	0
2012	control	Rodents	0
2012	control	Rodents	0
2012	control	Rodents	0
2012	control	Rodents	0
2012	control	Rodents	0
2012	control	Rodents	0
2012	control	Rodents	0
2012	control	Rodents	0
2012	control	Rodents	0
2012	control	Rodents	0
2012	control	Rodents	0
2012	control	Rodents	0
2012	control	Rodents	0
2012	control	Rodents	0
2012	control	Rodents	0
2012	control	Rodents	0
2012	control	Rodents	0
2012	control	Rodents	0
2012	control	Rodents	0
2013	control	Rodents	0
2013	control	Rodents	0
2013	control	Rodents	0
2013	control	Rodents	0
2013	control	Rodents	0
2013	control	Rodents	0
2013	control	Rodents	0
2013	control	Rodents	0
2013	control	Rodents	0
2013	control	Rodents	0
2013	control	Rodents	0
2013	control	Rodents	0
2013	control	Rodents	0
2013	control	Rodents	0
2013	control	Rodents	0
